# Supplementary material for: Country risks analysis for the development of green hydrogen and synthetic fuel sectors in the MENA region
Source: Frontiers journal article supplement (doi:10.3389/fenrg.2024.1466381), 2024-11-29
Supplement: Data_Sheet_1.PDF [file Data_Sheet_1.PDF]

## Supplementary Material

### 1 Risk assessment framework

TABLE 1. Risk assessment indicators

| Risks                         | Risk components       | Risk drivers                                                                   | No.  | Indicators                                                                                             | Sources                                                                           |
|-------------------------------|-----------------------|--------------------------------------------------------------------------------|------|--------------------------------------------------------------------------------------------------------|-----------------------------------------------------------------------------------|
| (1)<br>Conflicts and violence | Political instability | - Ethnic, linguistic, or religious tensions                                    | 1.1  | CIA World factbook<br><b>Regime type</b>                                                               | CIA (2020)                                                                        |
|                               |                       | - Military involvement in politics                                             | 1.2  | Regime Authority Characteristics<br><b>Lack of democracy</b>                                           | Herre et al. (2013)                                                               |
|                               |                       | - Religious influence in politics                                              | 1.3  | Worldwide Governance Indicators (WGI)<br><b>Political Stability and Absence of violence/ terrorism</b> | World Bank (2018)                                                                 |
|                               |                       | - Use of coercive measures to maintain the regime                              | 1.4  | AON Risk Map<br><b>Terrorism and Political violence risk</b>                                           | AON (2020)                                                                        |
|                               |                       | - Structure of the political system (e.g., democracy, monarchy, military rule) | 1.5  | Country Reports on <b>Terrorism</b>                                                                    | United States Department of State Publication & Bureau of Counterterrorism (2018) |
|                               |                       | - Development of political parties                                             | 1.6  | CIA World factbook<br><b>Terrorism</b>                                                                 | CIA (2020)                                                                        |
|                               |                       | - Public participation in the political process                                | 1.7  | IIK - Heidelberger Institut für Internationale Konfliktforschung<br><b>Violent conflicts</b>           | IIK (2019)                                                                        |
|                               |                       | - Legitimacy of government (e.g., elections)                                   | 1.8  | Uppsala University - Department of Peace and Conflict Research<br><b>Fatal events</b>                  | Hegre et al. (2020)                                                               |
|                               |                       | - Political violence and social unrest                                         | 1.9  | Global Peace Index<br><b>State of peace</b>                                                            | IEP (2020)                                                                        |
|                               |                       | - Ideological shifts                                                           | 1.10 | Early Warning Project<br><b>Risk Assessment for Mass Killing</b>                                       | EWP (2020)                                                                        |
|                               |                       | - ...                                                                          | 1.11 | Disaster Risk Management Knowledge Centre<br><b>Risk of humanitarian crises and disasters</b>          | DRMKC (2020)                                                                      |
|                               |                       |                                                                                | 1.12 | Political Risk Map<br><b>Country risk index</b>                                                        | MARSH (2020)                                                                      |
|                               | Social instability    | - Unemployment rate (especially youth unemployment)                            | 1.13 | World inequality database<br><b>Income inequality</b>                                                  | WID (2020)                                                                        |
|                               |                       | - Income disparities                                                           | 1.14 | ILOSTAT database<br><b>Unemployment rate</b>                                                           | ILOSTAT (2020)                                                                    |
|                               |                       | - Unequal wealth distributions                                                 | 1.15 | ILOSTAT database<br><b>Share of youth not in employment, education or training</b>                     | ILOSTAT (2020)                                                                    |
|                               |                       | - Gender inequality                                                            | 1.16 | UNDP<br><b>Gender Inequality Index</b>                                                                 | UNDP (2020)                                                                       |
|                               |                       | - Urbanization rate                                                            | 1.17 | Worldwide Governance Indicators (WGI) -<br><b>Voice and accountability</b>                             | World Bank (2018)                                                                 |
|                               |                       | - Population growth                                                            | 1.18 | World Bank data<br><b>Population growth</b>                                                            | World Bank (2020a)                                                                |
|                               |                       | - ...                                                                          | 1.19 | Human Rights Watch<br><b>Qualitative Report</b>                                                        | Human Rights Watch. (2018)                                                        |
|                               |                       | -                                                                              | 1.20 | Human Rights<br><b>Human Rights Scores</b>                                                             | Herre et al. (2016)                                                               |

|                                   |                             |                                                                                                                                                                                                                                                                                                                                                                                     |                                                                                                                                                                                                                                                     |                                                                                         |                                                                       |                                   |
|-----------------------------------|-----------------------------|-------------------------------------------------------------------------------------------------------------------------------------------------------------------------------------------------------------------------------------------------------------------------------------------------------------------------------------------------------------------------------------|-----------------------------------------------------------------------------------------------------------------------------------------------------------------------------------------------------------------------------------------------------|-----------------------------------------------------------------------------------------|-----------------------------------------------------------------------|-----------------------------------|
|                                   | Economic stability          | <ul style="list-style-type: none"><li>- GDP development</li><li>- Level of inflation</li><li>- Level of debt</li><li>- Economic development status</li><li>- ...</li></ul>                                                                                                                                                                                                          | 1.21                                                                                                                                                                                                                                                | World Bank data<br><b>GDP per capita growth</b>                                         | World Bank (2020a)                                                    |                                   |
|                                   |                             |                                                                                                                                                                                                                                                                                                                                                                                     | 1.22                                                                                                                                                                                                                                                | Economist World debt comparison<br><b>Total debt and debt increase</b>                  | Economist (2012)                                                      |                                   |
|                                   |                             |                                                                                                                                                                                                                                                                                                                                                                                     | 1.23                                                                                                                                                                                                                                                | IMF DATA Mapper<br><b>Inflation rate, average consumer prices</b>                       | IMF (2020)                                                            |                                   |
|                                   |                             |                                                                                                                                                                                                                                                                                                                                                                                     | 1.24                                                                                                                                                                                                                                                | CIA World factbook<br><b>Economy</b>                                                    | CIA (2020)                                                            |                                   |
|                                   |                             |                                                                                                                                                                                                                                                                                                                                                                                     | 1.25                                                                                                                                                                                                                                                | Political Risk Map 2019<br><b>Economic risk index</b>                                   | MARSH (2020)                                                          |                                   |
|                                   | Geopolitical situation      | <ul style="list-style-type: none"><li>- Existing or pending sanctions</li><li>- Trade conflicts and barriers</li><li>- Human rights violations</li><li>- War or armed conflicts</li><li>- Dependence on external support</li><li>- ...</li></ul>                                                                                                                                    | 1.26                                                                                                                                                                                                                                                | Sanction Risks<br><b>Sanction risk rating</b>                                           | SanctIO (2020)                                                        |                                   |
|                                   |                             |                                                                                                                                                                                                                                                                                                                                                                                     | 1.27                                                                                                                                                                                                                                                | Global Conflict Tracker<br><b>Conflict status and type</b>                              | CFR (2020)                                                            |                                   |
|                                   |                             |                                                                                                                                                                                                                                                                                                                                                                                     | 1.28                                                                                                                                                                                                                                                | Literature review<br><b>Geopolitical situation</b>                                      | n/a                                                                   |                                   |
|                                   | (2) Government intervention | Government actions                                                                                                                                                                                                                                                                                                                                                                  | <ul style="list-style-type: none"><li>- History of property or resource nationalization</li><li>- History of contract repudiation</li><li>- Unexpected changes in taxation, tariffs, or laws</li><li>- Resource nationalism</li><li>- ...</li></ul> | 2.1                                                                                     | <b>Expropriation risk</b>                                             | TGE (2020)                        |
|                                   |                             |                                                                                                                                                                                                                                                                                                                                                                                     |                                                                                                                                                                                                                                                     | 2.2                                                                                     | AON Risk Map<br><b>Political Interference Risk</b>                    | AON (2020)                        |
| (3) Conditions for doing business | Business environment        | <ul style="list-style-type: none"><li>- Counterparty payment track record</li><li>- Ease to do business</li><li>- Conditions of starting a business</li><li>- Socio-cultural differences in doing business</li><li>- ...</li></ul>                                                                                                                                                  | 3.1                                                                                                                                                                                                                                                 | World Bank - Doing business<br><b>Ease of Doing Business Scores overall</b>             | World Bank (2020b)                                                    |                                   |
|                                   |                             |                                                                                                                                                                                                                                                                                                                                                                                     | 3.2                                                                                                                                                                                                                                                 | World Bank - Doing business<br><b>Starting a Business</b>                               | World Bank (2020b)                                                    |                                   |
|                                   | Currency risk               | <ul style="list-style-type: none"><li>- Exchange rate volatility and fluctuations</li><li>- Currency stability over time</li><li>- Inflation and its impact on currency value</li><li>- Trade imbalances and their effect on exchange rates</li><li>- Capital flow restrictions and currency controls</li><li>- Foreign debt levels affecting currency risk</li><li>- ...</li></ul> | 3.3                                                                                                                                                                                                                                                 | Currency risks<br><b>Risk of nations currency</b>                                       | CanBack (2015)                                                        |                                   |
|                                   |                             |                                                                                                                                                                                                                                                                                                                                                                                     | 3.4                                                                                                                                                                                                                                                 | Transfer risk - Country rankings<br><b>Currency inconvertibility and transfer risk,</b> | TGE (2020)                                                            |                                   |
|                                   |                             |                                                                                                                                                                                                                                                                                                                                                                                     | 3.5                                                                                                                                                                                                                                                 | Global Climatescope<br><b>Currency variation</b>                                        | Climascope, & Bloomberg NEF. (2019)                                   |                                   |
|                                   |                             |                                                                                                                                                                                                                                                                                                                                                                                     | 3.6                                                                                                                                                                                                                                                 | World Bank - Doing business<br><b>Trading across Borders Scores</b>                     | World Bank (2020b)                                                    |                                   |
|                                   | Trading across borders      | <ul style="list-style-type: none"><li>- Requirements for imports and exports</li><li>- Export restrictions</li><li>- Regulatory standards and compliance measures</li><li>- Quality standards and customs procedures</li><li>- ...</li></ul>                                                                                                                                        | 3.7                                                                                                                                                                                                                                                 | Export documents<br><b>The number of documents required for exporting</b>               | TGE (2020)                                                            |                                   |
|                                   | (4) Quality of governance   | Corruption                                                                                                                                                                                                                                                                                                                                                                          | <ul style="list-style-type: none"><li>- Bribery, trading in influence, abuse of functions etc.</li><li>- Corruption levels</li><li>- ...</li></ul>                                                                                                  | 4.1                                                                                     | Transparency international<br><b>Corruption index</b>                 | Transparency International (2020) |
|                                   |                             |                                                                                                                                                                                                                                                                                                                                                                                     |                                                                                                                                                                                                                                                     | 4.2                                                                                     | Worldwide Governance Indicators (WGI)<br><b>Control of corruption</b> | World Bank. (2018)                |
|                                   |                             |                                                                                                                                                                                                                                                                                                                                                                                     |                                                                                                                                                                                                                                                     | 4.3                                                                                     | The GAN Business Anti-Corruption Portal<br><b>Country reports</b>     | GAN (2020)                        |
| Legal system insufficiencies      |                             | <ul style="list-style-type: none"><li>- Law and order traditions</li><li>- Legal system</li><li>- Copyright protection</li><li>- Enforceability of e.g. property rights, contract rights</li></ul>                                                                                                                                                                                  | 4.4                                                                                                                                                                                                                                                 | Worldwide Governance Indicators (WGI)<br><b>Rule of Law</b>                             | World Bank. (2018)                                                    |                                   |
|                                   |                             |                                                                                                                                                                                                                                                                                                                                                                                     | 4.5                                                                                                                                                                                                                                                 | AON Risk Map<br><b>Legal and regulatory risk</b>                                        | AON (2020)                                                            |                                   |

|                                                                                                   |                                                       |                                                                                                                                                                                                                                                                                                                                                                                                                                                                                                                                                                                                                       |      |                                                                                                          |                                                |
|---------------------------------------------------------------------------------------------------|-------------------------------------------------------|-----------------------------------------------------------------------------------------------------------------------------------------------------------------------------------------------------------------------------------------------------------------------------------------------------------------------------------------------------------------------------------------------------------------------------------------------------------------------------------------------------------------------------------------------------------------------------------------------------------------------|------|----------------------------------------------------------------------------------------------------------|------------------------------------------------|
|                                                                                                   | - ...                                                 |                                                                                                                                                                                                                                                                                                                                                                                                                                                                                                                                                                                                                       | 4.6  | World Justice Project (WJP)<br><b>WJP Rule of Law Index</b>                                              | WJP (2020)                                     |
|                                                                                                   |                                                       |                                                                                                                                                                                                                                                                                                                                                                                                                                                                                                                                                                                                                       | 4.7  | Global Lex<br><b>Descriptions legal systems countries</b>                                                | NYU Law (2020)                                 |
|                                                                                                   |                                                       |                                                                                                                                                                                                                                                                                                                                                                                                                                                                                                                                                                                                                       | 4.8  | CIA World factbook<br><b>Legal System</b>                                                                | CIA (2020)                                     |
|                                                                                                   | Resource Management                                   | - Revenue management<br>- Value realization<br>- ...                                                                                                                                                                                                                                                                                                                                                                                                                                                                                                                                                                  | 4.9  | <b>Resource Governance Index</b>                                                                         | NRGI (2021)                                    |
|                                                                                                   |                                                       |                                                                                                                                                                                                                                                                                                                                                                                                                                                                                                                                                                                                                       | 4.10 | Literature review<br><b>Resource management strategies</b>                                               | n/a                                            |
| (5)<br><b>Political and trade relations with Germany/ EU</b>                                      | Quality of bilateral and trade relations              | <ul style="list-style-type: none"> <li>- Level of bilateral trade and cooperation agreements</li> <li>- Existing energy partnerships</li> <li>- Absence of institutional and diplomatic relations</li> <li>- Foreign trade relations with the EU/Germany, particularly in energy imports and exports</li> <li>- Existing trade treaties and agreements</li> <li>- Export restrictions due to domestic energy needs</li> <li>- Trade barriers or tariffs impacting energy trade</li> <li>- ...</li> </ul>                                                                                                              | 5.1  | Bilateral relations and German missions<br><b>Country information bilateral relations with Germany</b>   | Federal Foreign Office Germany (2020a)         |
|                                                                                                   |                                                       |                                                                                                                                                                                                                                                                                                                                                                                                                                                                                                                                                                                                                       | 5.2  | <b>Energy partnership with Germany</b>                                                                   | Federal Foreign Office Germany (2020b)         |
|                                                                                                   |                                                       |                                                                                                                                                                                                                                                                                                                                                                                                                                                                                                                                                                                                                       | 5.3  | EU<br><b>EU trade treaty map</b>                                                                         | European Council (2020)                        |
|                                                                                                   |                                                       |                                                                                                                                                                                                                                                                                                                                                                                                                                                                                                                                                                                                                       | 5.4  | World Integrated Trade solutions (World Bank)<br><b>Import and Export to Germany and Europe</b>          | WITS (2020)                                    |
|                                                                                                   |                                                       |                                                                                                                                                                                                                                                                                                                                                                                                                                                                                                                                                                                                                       | 5.5  | Stockholm environmental Institute<br><b>Trade openness</b>                                               | Benzie et al. (2016)                           |
|                                                                                                   |                                                       |                                                                                                                                                                                                                                                                                                                                                                                                                                                                                                                                                                                                                       | 5.6  | Literature research on <b>bilateral and trade relations</b>                                              | n/a                                            |
|                                                                                                   |                                                       |                                                                                                                                                                                                                                                                                                                                                                                                                                                                                                                                                                                                                       | 6.1  | Literature review<br><b>Stakeholder attitudes and public discussions of RE and syn. fuels</b>            | n/a                                            |
| (6)<br><b>Unfavourable framework conditions for renewable energies/ hydrogen/ synthetic fuels</b> | Stakeholder attitudes towards RE and synthetic fuels  | <ul style="list-style-type: none"> <li>- Stakeholder positions and attitudes towards RE, hydrogen and synthetic fuels,</li> <li>- Influence of stakeholders on policy and implementation</li> <li>- Interests of stakeholders in the energy transition</li> <li>- Collaboration and alignment among stakeholders regarding PtX initiatives</li> <li>- ...</li> </ul>                                                                                                                                                                                                                                                  |      |                                                                                                          |                                                |
|                                                                                                   | Political importance of decarbonisation and SDGs      | <ul style="list-style-type: none"> <li>- Commitments to achieving the goals outlined in the Paris Agreement</li> <li>- Ambitions related to the Sustainable Development Goals (SDGs), including specific climate protection targets</li> <li>- ...</li> </ul>                                                                                                                                                                                                                                                                                                                                                         | 6.2  | LSE London<br><b>Number of climate legislation by country</b>                                            | <b>LSE (2020)</b>                              |
|                                                                                                   |                                                       |                                                                                                                                                                                                                                                                                                                                                                                                                                                                                                                                                                                                                       | 6.3  | REN 21 RENEWABLES 2019 GLOBAL STATUS REPORT<br><b>Renewable energy in INDC or NDC</b>                    | REN21(2020)                                    |
|                                                                                                   |                                                       |                                                                                                                                                                                                                                                                                                                                                                                                                                                                                                                                                                                                                       | 6.4  | <b>Quality and ambitions of NDCs</b>                                                                     | UNFCCC (2020)<br>Climate action tracker (2020) |
|                                                                                                   |                                                       |                                                                                                                                                                                                                                                                                                                                                                                                                                                                                                                                                                                                                       |      | Sustainable Development Report Dashboards 2019<br><b>SDG Index</b>                                       | Sachs et al. (2019)                            |
|                                                                                                   | Strategic role of renewable energies 2030 (2040,2050) | <ul style="list-style-type: none"> <li>- Energy supply and demand dynamics, including the share of renewable energy (RE) sources</li> <li>- National strategies for renewable energy development, including potential hydrogen and synthetic fuel initiatives</li> <li>- Resource availability studies and assessments of renewable energy potential</li> <li>- Alignment of national energy targets with global climate and sustainability goals</li> <li>- Challenges related to low dispatch priority for renewable energy sources</li> <li>- Infrastructure readiness for integrating renewable energy</li> </ul> | 6.5  | World Bank database<br><b>Renewable energy consumption</b>                                               | World Bank. (2020a)                            |
|                                                                                                   |                                                       |                                                                                                                                                                                                                                                                                                                                                                                                                                                                                                                                                                                                                       | 6.6  | IEA/IRENA Global Renewable Energy Policies and Measures Database<br><b>Renewable energy targets</b>      | IEA/IRENA (2020)                               |
|                                                                                                   |                                                       |                                                                                                                                                                                                                                                                                                                                                                                                                                                                                                                                                                                                                       | 6.7  | Global Climatescope<br><b>Gap to target</b>                                                              | Climascope, Bloomberg & NEF (2019)             |
|                                                                                                   |                                                       |                                                                                                                                                                                                                                                                                                                                                                                                                                                                                                                                                                                                                       | 6.8  | Literature review<br><b>Resource assessments RE /hydrogen/ synthetic fuels/ desalination potentials,</b> | n/a                                            |

|                                          |                                                                                                                                                                    |      |                                                                                                                                                                                |                                        |
|------------------------------------------|--------------------------------------------------------------------------------------------------------------------------------------------------------------------|------|--------------------------------------------------------------------------------------------------------------------------------------------------------------------------------|----------------------------------------|
| Existing economic and industry structure | - ...                                                                                                                                                              |      |                                                                                                                                                                                |                                        |
|                                          | - Country's economic structure                                                                                                                                     | 6.9  | CIA World factbook<br><b>Energy</b> (statistics oil, gas imports/exports, refinery etc.)                                                                                       | CIA (2020)                             |
|                                          | - Adaptability of existing business models to hydrogen/synthetic fuels                                                                                             | 6.10 | GLOBAL FOSSIL INFRASTRUCTURE TRACKER<br><b>Information on existing and proposed oil and gas pipelines, LNG terminals, and coal terminals by country</b>                        | GGON (2020)                            |
|                                          | - Relevant industrial structures                                                                                                                                   | 6.11 | GAS INFRASTRUCTURE MAP OF THE MEDITERRANEAN REGION<br><b>Report on gas infrastructure</b>                                                                                      | MedReg. (2018)                         |
|                                          | - Port and transport infrastructures                                                                                                                               | 6.12 | World Bank database<br><b>Industry (including construction), value added</b>                                                                                                   | World Bank. (2020a)                    |
|                                          | - ...                                                                                                                                                              | 6.13 | World Port source<br><b>Port infrastructure</b>                                                                                                                                | World Port Source (2020)               |
|                                          |                                                                                                                                                                    | 6.14 | MENA Fuels Table Economic structure<br><b>Structure economic sectors</b>                                                                                                       | GTAI (2020)                            |
|                                          |                                                                                                                                                                    | 6.15 | RECREE<br><b>Renewable Energy Country Profile</b>                                                                                                                              | RCREEE (2019)                          |
|                                          |                                                                                                                                                                    | 6.16 | IEA/IRENA Global Renewable Energy Database<br>· <b>Economic Instrument</b><br>· <b>Information and Education</b><br>· <b>Policy Support</b><br>· <b>Regulatory Instruments</b> | IEA/IRENA (2020)                       |
|                                          |                                                                                                                                                                    | 6.17 | REN 21 RENEWABLES 2019 GLOBAL STATUS REPORT<br><b>Regulatory Policies</b>                                                                                                      | REN21(2020)                            |
|                                          |                                                                                                                                                                    | 6.18 | Auswärtiges Amt<br><b>Policy Instruments renewable energy</b>                                                                                                                  | Federal Foreign Office Germany (2020b) |
|                                          |                                                                                                                                                                    | 6.19 | Global Climatescope<br><b>Utility Privatisation</b>                                                                                                                            | Climascope, Bloomberg & NEF (2019)     |
|                                          |                                                                                                                                                                    |      |                                                                                                                                                                                |                                        |
|                                          |                                                                                                                                                                    |      |                                                                                                                                                                                |                                        |
| Regulatory hurdles and uncertainty       | - Lack of a comprehensive framework/legislation for concentrated solar power (CSP), photovoltaic (PV), and wind energy and independent power producers (IPPs)      |      |                                                                                                                                                                                |                                        |
|                                          | - Insufficient regulations and plans for RE (Missing grid codes and technical specifications, ambiguities regarding grid connection, pricing, volume requirements) |      |                                                                                                                                                                                |                                        |
| Energy efficiency                        | - Regulatory frameworks for IPPs and related entities                                                                                                              |      |                                                                                                                                                                                |                                        |
|                                          | - Grid access regulations and procedures                                                                                                                           |      |                                                                                                                                                                                |                                        |
|                                          | - Tendering processes for renewable energy projects                                                                                                                |      |                                                                                                                                                                                |                                        |
|                                          | - Track record of project implementation and existing project pipeline                                                                                             |      |                                                                                                                                                                                |                                        |
|                                          | - Stringent environmental                                                                                                                                          |      |                                                                                                                                                                                |                                        |
|                                          | - ...                                                                                                                                                              |      |                                                                                                                                                                                |                                        |
| (7) Unfavourable investment conditions   | - Energy intensity                                                                                                                                                 | 6.20 | IEA<br><b>Energy Intensity</b>                                                                                                                                                 | IEA (2020a)                            |
|                                          | - Energy use                                                                                                                                                       | 6.21 | World Bank<br><b>Energy Use</b> (kgoe/cap)                                                                                                                                     | World Bank. (2020a)                    |
| Availability of finance                  | - Efficiency measures                                                                                                                                              |      |                                                                                                                                                                                |                                        |
|                                          | - ...                                                                                                                                                              |      |                                                                                                                                                                                |                                        |
|                                          | - Availability of international financial support for renewable energy (RE), hydrogen, and synthetic fuels                                                         | 7.1  | Global Financial Development Report 2017 / 2018<br><b>Financial system evaluation</b>                                                                                          | World Bank (2019)                      |
|                                          | - Access to investment and operating capital for project development                                                                                               | 7.2  | World Bank TCdata360<br><b>Availability of financial services</b>                                                                                                              | World Bank (2020d)                     |
|                                          | - Interest rate fluctuations                                                                                                                                       | 7.3  | World Bank TCdata360<br><b>Share of firms identifying access to finance as a major constraint</b>                                                                              | World Bank (2020d)                     |
|                                          | - Factors affecting creditworthiness,                                                                                                                              | 7.4  | World Bank TCdata360<br><b>Venture capital availability</b>                                                                                                                    | World Bank (2020d)                     |
|                                          | - Liquidity constraints faced by domestic banks impacting financing options                                                                                        | 7.5  | IRENA Data & Statistics<br><b>Renewable Energy Finance Flows</b>                                                                                                               | IRENA (2020)                           |
|                                          | - Limited experience among banks and investors with utility-scale renewable energy, hydrogen, and synthetic fuel projects                                          | 7.6  | Global Climatescope<br><b>Availability of Finance</b>                                                                                                                          | Climascope, Bloomberg & NEF (2019)     |
|                                          |                                                                                                                                                                    | 7.7  | Global Climatescope<br><b>Foreign Investment share</b>                                                                                                                         | Climascope, Bloomberg & NEF (2019)     |
|                                          |                                                                                                                                                                    | 7.8  | Global Climatescope<br><b>Offtaker Risk</b>                                                                                                                                    | Climascope, Bloomberg & NEF (2019)     |
|                                          | - ...                                                                                                                                                              |      |                                                                                                                                                                                |                                        |

|                                                                            |                                           |                                                                                                                                                                                                                                                                                                                                                                                                                                                                                                                                                                                                                                                                                                                                                                                                                                                                                        |                                                                                                                                          |                                    |
|----------------------------------------------------------------------------|-------------------------------------------|----------------------------------------------------------------------------------------------------------------------------------------------------------------------------------------------------------------------------------------------------------------------------------------------------------------------------------------------------------------------------------------------------------------------------------------------------------------------------------------------------------------------------------------------------------------------------------------------------------------------------------------------------------------------------------------------------------------------------------------------------------------------------------------------------------------------------------------------------------------------------------------|------------------------------------------------------------------------------------------------------------------------------------------|------------------------------------|
|                                                                            | Financial incentives & Public financing   | <ul style="list-style-type: none"> <li>- Ambitions towards Paris Agreement</li> <li>- Ambitions in regard to Sustainable Development Goals (SDGs) (including climate protection targets)</li> <li>- ...</li> </ul>                                                                                                                                                                                                                                                                                                                                                                                                                                                                                                                                                                                                                                                                     | <b>7.9</b> REN 21 RENEWABLES 2019 GLOBAL STATUS REPORT<br><b>Overview Fiscal Incentives and Public Financing</b>                         | REN21(2020)                        |
|                                                                            |                                           |                                                                                                                                                                                                                                                                                                                                                                                                                                                                                                                                                                                                                                                                                                                                                                                                                                                                                        | <b>7.10</b> Global Climatescope<br><b>Average VAT paid by RE</b>                                                                         | Climascope, Bloomberg & NEF (2019) |
|                                                                            |                                           |                                                                                                                                                                                                                                                                                                                                                                                                                                                                                                                                                                                                                                                                                                                                                                                                                                                                                        | <b>7.11</b> Global Climatescope<br><b>Import Duties</b>                                                                                  | Climascope, Bloomberg & NEF (2019) |
|                                                                            | Energy market accessibility               | <ul style="list-style-type: none"> <li>- Market distortions (e.g. high subsidies for fossil fuels)</li> <li>- Limitations related to energy market liberalization</li> <li>- ...</li> </ul>                                                                                                                                                                                                                                                                                                                                                                                                                                                                                                                                                                                                                                                                                            | <b>7.12</b> IEA<br><b>Fossil Fuel subsidies</b>                                                                                          | IEA. (2020b)                       |
|                                                                            |                                           |                                                                                                                                                                                                                                                                                                                                                                                                                                                                                                                                                                                                                                                                                                                                                                                                                                                                                        | <b>7.13</b> Literature review<br><b>Status market liberalisation</b>                                                                     | n/a                                |
| <b>(8) Unfavourable project approval, licensing and permitting process</b> | Institutional ineffectiveness             | <ul style="list-style-type: none"> <li>- Timeframes for obtaining licenses and permits for RE projects, hydrogen, and synthetic fuels</li> <li>- Experience level with international industry tenders, particularly in renewable energy</li> <li>- Limitations in the design of standard Power Purchase Agreements (PPAs) and/or PPA tendering processes</li> <li>- Transparency and accountability of institutions, data management, and procedural practices</li> <li>- Conflicts arising from differing institutional requirements</li> <li>- Unclear or undefined roles and responsibilities of institutional actors</li> <li>- Lack of transparency in the contract award process</li> <li>- Hierarchical structures affecting decision-making</li> <li>- ...</li> </ul>                                                                                                          | <b>8.1</b> World Bank - Doing business<br><b>Dealing with Construction Permits</b>                                                       | World Bank (2020b)                 |
|                                                                            |                                           |                                                                                                                                                                                                                                                                                                                                                                                                                                                                                                                                                                                                                                                                                                                                                                                                                                                                                        | <b>8.2</b> World Bank - Enterprise Surveys<br><b>Share of firms identifying business licensing and permits as a major constraint</b>     | World Bank (2020c)                 |
|                                                                            |                                           |                                                                                                                                                                                                                                                                                                                                                                                                                                                                                                                                                                                                                                                                                                                                                                                                                                                                                        | <b>8.3</b> World Bank - Enterprise Surveys<br><b>Days to obtain an operating license</b>                                                 | World Bank (2020c)                 |
|                                                                            |                                           |                                                                                                                                                                                                                                                                                                                                                                                                                                                                                                                                                                                                                                                                                                                                                                                                                                                                                        | <b>8.4</b> World Bank - Enterprise Surveys<br><b>Senior management time spent dealing with the requirements of government regulation</b> | World Bank (2020c)                 |
|                                                                            |                                           |                                                                                                                                                                                                                                                                                                                                                                                                                                                                                                                                                                                                                                                                                                                                                                                                                                                                                        | <b>8.5</b> Literature review<br><b>Permitting and licensing process</b>                                                                  | n/a                                |
|                                                                            |                                           |                                                                                                                                                                                                                                                                                                                                                                                                                                                                                                                                                                                                                                                                                                                                                                                                                                                                                        |                                                                                                                                          |                                    |
| <b>(9) Labour and expertise availability</b>                               | Human resource and expertise availability | <ul style="list-style-type: none"> <li>- Local content requirements</li> <li>- Skilled and experienced workforce in the country</li> <li>- Lack of local firms offering required technology components, construction and maintenance services (e.g. low experience of O&amp;M team, insufficient qualification profile of staff, institutional/organizational shortcomings, disregards of best-practices rules, poor document management, lack of engineering competences, Insufficient site visits, lack of project management skills, insufficient construction supervision)</li> <li>- Locally available, construction, operation, maintenance personal</li> <li>- Lack of relevant education programs in the country</li> <li>- Cultural differences in work organisation</li> <li>- Potential for strikes</li> <li>- Level of organisation of workforce</li> <li>- ...</li> </ul> | <b>9.1</b> IRENA<br><b>Renewable Energy Employment by Country</b>                                                                        | IRENA (2020)                       |
|                                                                            |                                           |                                                                                                                                                                                                                                                                                                                                                                                                                                                                                                                                                                                                                                                                                                                                                                                                                                                                                        | <b>9.2</b> WEF<br><b>Global Human Capital Index</b>                                                                                      | WEF (2017)                         |
|                                                                            |                                           |                                                                                                                                                                                                                                                                                                                                                                                                                                                                                                                                                                                                                                                                                                                                                                                                                                                                                        | <b>9.3</b> World Bank - Enterprise Surveys<br><b>Share of firms identifying an inadequately educated workforce as a major constraint</b> | World Bank (2020c)                 |
|                                                                            |                                           |                                                                                                                                                                                                                                                                                                                                                                                                                                                                                                                                                                                                                                                                                                                                                                                                                                                                                        | <b>9.4</b> World Bank - Enterprise Surveys<br><b>Proportion of skilled workers</b>                                                       | World Bank (2020c)                 |
|                                                                            |                                           |                                                                                                                                                                                                                                                                                                                                                                                                                                                                                                                                                                                                                                                                                                                                                                                                                                                                                        | <b>9.5</b> World Bank - Enterprise Surveys<br><b>Proportion of workers offered formal training</b>                                       | World Bank (2020c)                 |

|                               |                                                                             |                                                                                                                                                                                                                                                                                                                                                                                                                                                                                                                                                                                                                                                                                                                                                   |      |                                                                                                                                                                                        |                                            |
|-------------------------------|-----------------------------------------------------------------------------|---------------------------------------------------------------------------------------------------------------------------------------------------------------------------------------------------------------------------------------------------------------------------------------------------------------------------------------------------------------------------------------------------------------------------------------------------------------------------------------------------------------------------------------------------------------------------------------------------------------------------------------------------------------------------------------------------------------------------------------------------|------|----------------------------------------------------------------------------------------------------------------------------------------------------------------------------------------|--------------------------------------------|
| <b>(10) Social acceptance</b> | Lack of awareness & acceptance                                              | <ul style="list-style-type: none"> <li>- Limited communication about the project in the planning phase</li> <li>- Limited integration of communities</li> <li>- Local knowledge base, attitude, influence and interest</li> <li>- Education levels</li> <li>- History of social and political resistance against new infrastructure projects</li> <li>- Resource use (water, land etc. for export)</li> <li>- Social/environmental opposition to economic projects</li> <li>- Indigenous opposition to economic projects</li> <li>- Misperceptions</li> <li>- Socio-cultural between project developers and locals</li> <li>- Tribal issues</li> <li>- Health concerns</li> <li>- Conflict of interest</li> <li>- NIMBY</li> <li>- ...</li> </ul> | 10   | Literature review                                                                                                                                                                      | n/a                                        |
|                               |                                                                             |                                                                                                                                                                                                                                                                                                                                                                                                                                                                                                                                                                                                                                                                                                                                                   |      | Indicators of social acceptance of a technology include knowledge/education (what does the public know), perception (what does the public think), and fear (what does the public feel) |                                            |
| <b>(11) Natural hazards</b>   | Extreme weather conditions (sand storms, extreme wind conditions, flooding) | <ul style="list-style-type: none"> <li>- Impact of climate change on the infrastructure or operation of RE/hydrogen or synthetic fuel infrastructures</li> <li>- ...</li> </ul>                                                                                                                                                                                                                                                                                                                                                                                                                                                                                                                                                                   | 11.1 | WorldRiskReport<br><b>World Risk Index</b>                                                                                                                                             | IFHV and Bündnis Entwicklung Hilft (2019). |
|                               |                                                                             |                                                                                                                                                                                                                                                                                                                                                                                                                                                                                                                                                                                                                                                                                                                                                   | 11.2 | Notre Dame-Global Adaptation<br><b>ND-GAIN Country Index</b>                                                                                                                           | ND-GAIN (2020)                             |
|                               |                                                                             |                                                                                                                                                                                                                                                                                                                                                                                                                                                                                                                                                                                                                                                                                                                                                   | 11.3 | SEI<br><b>Transnational Climate Impacts (TCI) Index</b>                                                                                                                                | Benzie et al. (2016)                       |

## 2 References

AON (2020). Risk Map 2020. Aon Risk Portal. <https://www.riskmaps.aon.co.uk/TerrorismRisk/Map>

Benzie, M., J. Hedlund and H. Carlsen (2016). Introducing the Transnational Climate Impacts Index: Indicators of country-level exposure – methodology report. Working Paper 2016-07. Stockholm Environment Institute: Stockholm.

Canback. (2015). The Risk of Nations—Currency. <https://www.canback.com/story/the-risk-of-nations-currency/>

CIA (2020). The World Factbook. <https://www.cia.gov/library/publications/resources/the-world-factbook/>

Climascope, Bloomberg & NEF. (2019). Climatescope 2019: Jordan. Climatescope 2019. <https://global-climatescope.org>

CMS. (2020). Renewable Energy. CMS Legal Services EEIG (CMS EEIG).

CFR - Council on Foreign Relations. (2020). Conflict Status and Type. Global Conflict Tracker. <https://www.cfr.org/global-conflict-tracker>

DRMKC - Disaster Risk Management Knowledge Centre (2020) INFORM Risk Index. European Commission. <https://drmkc.jrc.ec.europa.eu/inform-index/INFORM-Risk>

Economist (2012). Economist World debt comparison Total debt and debt increase. [https://www.economist.com/content/global\\_debt\\_clock?fsrc=scn/fb/wl/bl/globaldebtclock](https://www.economist.com/content/global_debt_clock?fsrc=scn/fb/wl/bl/globaldebtclock)

European Council (2020). EU trade agreements. <https://www.consilium.europa.eu/en/policies/trade-policy/trade-agreements/>

EWP - Early warning project (2020). Map of Statistical Risk for Mass Killing. United States Holocaust Memorial Museum. <https://earlywarningproject.ushmm.org/map>

Federal Foreign Office Germany (2020a). Information about bilateral relations and German missions abroad. <https://www.auswaertiges-amt.de/en/aussenpolitik/laenderinformationen>

Federal Foreign Office Germany (2020b). Energie- und Klimapartnerschaften. <https://www.auswaertiges-amt.de/de/aussenpolitik/klimaaussenpolitik/energie/energiepartnerschaften/238784>

GAN (2020). GAN Business Anti-Corruption Portal—Country Profiles. GAN Integrity. <https://www.ganintegrity.com/portal/country-profiles/>

GGON - Global Gas & Oil Network. (2020). Global Fossil Infrastructure Tracker. <http://ggon.org/fossil-tracker/>

GTAI (2020). Germany Trade & Invest. <https://www.gtai.de/de/trade>

Hegre, Håvard, Mihai Croicu, Kristine Eck, and Stina Höglbladh (July 2020) Introducing the UCDP Candidate Events Dataset. Research & Politics

Herre, B., Rodés-Guirao, L.; and Ortiz-Ospina, E. (2013) - “Democracy” Published online at OurWorldinData.org. Retrieved from: '<https://ourworldindata.org/democracy>'

Herre, B.; and Arriagada, P. (2016) - “Human Rights” Published online at OurWorldinData.org. Retrieved from: '<https://ourworldindata.org/human-rights>'

HIK (2019). Conflict Barometer 2018. <https://hiik.de/conflict-barometer/current-version/?lang=en>

Human Rights Watch. (2018). Events of 2018. World Report 2019. <https://www.hrw.org/world-report/2019>

IEA/IRENA (2020) Global Renewable Energy Policies and Measures Database. <https://www.iea.org/policies?source=IEA%2FIRENA%20Renewables%20Policies%20Database>

IEA (2020a). IEA Energy Atlas. <http://energyatlas.iea.org/#!/tellmap/-297203538/3>

IEA (2020b). Energy subsidies –Tracking the impact of fossil-fuel subsidies. IEA.  
<https://www.iea.org/topics/energy-subsidies>

IFHV and Bündnis Entwicklung Hilft (2019). World Risk Report 2019.  
<https://weltrisikobericht.de/english-2/>

ILOSTAT. (2020). ILOSTAT database. ILOSTAT Database. <https://ilostat.ilo.org/data/>

IEP - Institute for Economics and Peace (2020). Global Peace Index 2020 Measuring Peace in a Complex World, Sydney.

IMF - International Monetary Fund (2020). Inflation rate, average consumer prices.

IRENA. (2020). Data & Statistics. /Statistics/View-Data-by-Topic/Finance-and-Investment/Renewable-Energy-Finance-Flows

LSE. (2020). Climate Change Laws of the World. <https://climate-laws.org/>

MARSH. (2020). Country and Economic Risk Index. Political Risk Map 2019 - Rising Geopolitical Tensions. <https://www.marsh.com/de/de/campaigns/political-risk-map-2019.html>

MedReg (2018). Gas Infrastructure Map of the Mediterranean region (S. 41) [Final Report]. Mediterranean Energy Regulators (MedReg). [http://www.medreg-regulators.org/Portals/\\_default/Skede/Allegati/Skeda4506-254-2018.4.27/MEDREG\\_Gas\\_Infrastructure\\_Map\\_April\\_2018.pdf?IDUNI=fbqbnmvcdgc2zjfqpzpfhlkm6212](http://www.medreg-regulators.org/Portals/_default/Skede/Allegati/Skeda4506-254-2018.4.27/MEDREG_Gas_Infrastructure_Map_April_2018.pdf?IDUNI=fbqbnmvcdgc2zjfqpzpfhlkm6212)

NRGI - Natural Resource Governance Institute (2020). Resource Governance Index—Country Profiles. 2017 Resource Governance Index. <https://resourcegovernanceindex.org/country-profiles>

Climate Action Tracker (2020). New Climate & Climate Analytics. Climate Action Tracker. <https://climateactiontracker.org/>

ND-GAIN - Notre Dame Global Adaptation. (2020). ND-GAIN Country Inde. Notre Dame Global Adaptation Initiative. <https://gain.nd.edu/our-work/country-index/>

NYU Law (2020). Global Lex. <https://www.nyulawglobal.org/globalex/index.html>

RCREEE. (2019). Energy Efficiency and Renewable Energy Strategies and Policies. [https://rcreee.org/sites/default/files/meetmed\\_report\\_a1\\_1\\_final\\_191009.pdf](https://rcreee.org/sites/default/files/meetmed_report_a1_1_final_191009.pdf)

REN21 (2020). Renewables 2019 Global Status Report. REN21 Secretariat.

Roser, Max. (2019). Democracy—Political Regime – distinction democracies and full democracies, 2015. Our World in Data. <https://ourworldindata.org/democracy>

Sachs, J., Schmidt-Traub, G., Kroll, C., Lafortune, G., Fuller, G. (2019): Sustainable Development Report 2019. New York: Bertelsmann Stiftung and Sustainable Development Solutions Network (SDSN).

SanctIO (2020). Sanction risk rating by country. <https://sanctio.com/de>

TGE - The Global Economy (2020). Global Rankings. The Global Economy - Business and Economic Data for 200 Countries. <https://www.theglobaleconomy.com>

Transparency International (2020). Corruption Perceptions Index. <https://www.transparency.org/en/cpi/2018/results>

UNDP - United Nations Development Programme (2020). Gender Inequality Index (GII). <https://hdr.undp.org/data-center/thematic-composite-indices/gender-inequality-index#/indicies/GII>

UNFCCC (2020). NDC Registry. <https://unfccc.int/NDCREG>

United States Department of State Publication & Bureau of Counterterrorism (2018). Country Reports on Terrorism 2017. <https://www.state.gov/reports/country-reports-on-terrorism-2017/>

WEF (2017). The Global Human Capital Report 2017 [Insight Report]. <https://weforum.ent.box.com/s/dari4dktg4jt2g9xo2o5pksjpatvawdb>

WID - World Inequality Database (2020). Income inequality. [https://wid.world/world/#sptinc\\_p90p100\\_z/US;FR;DE;CN;ZA;GB;WO/last/eu/k/p/yearly/s/false/24.722500000000004/80/curve/false/country](https://wid.world/world/#sptinc_p90p100_z/US;FR;DE;CN;ZA;GB;WO/last/eu/k/p/yearly/s/false/24.722500000000004/80/curve/false/country)

World Bank. (2018). Worldwide Governance Indicators. <http://info.worldbank.org/governance/wgi/Home/Reports>

World Bank (2019). Global Financial Development Database. <https://www.worldbank.org/en/publication/gfdr/data/global-financial-development-database>

World Bank. (2020a). World Bank Open Data. <https://data.worldbank.org/>

World Bank. (2020b). Doing Business—Measuring Business Regulations. <https://www.doingbusiness.org/en/data/doing-business-score>

World Bank. (2020c). Enterprise Surveys Indicators Data—World Bank Group. <https://www.enterprisesurveys.org/en/data>

World Bank. (2020d). TCdata360 data on trade and competitiveness—World Bank Group. [https://tcdata360.worldbank.org/indicators/hbc4e8250?indicator=521&viz=line\\_chart&years=2010,2015](https://tcdata360.worldbank.org/indicators/hbc4e8250?indicator=521&viz=line_chart&years=2010,2015)

WITS - World Integrated Trade Solution. (2020). Import and Export to Germany and Europe. <https://wits.worldbank.org/CountryProfile/en/Country/DZA/Year/LTST/TradeFlow/Import/Partner/by-country/Product/Total>

WJP - World Justice Project (2020). WJP Rule of Law Index. <https://worldjusticeproject.org/rule-of-law-index/>

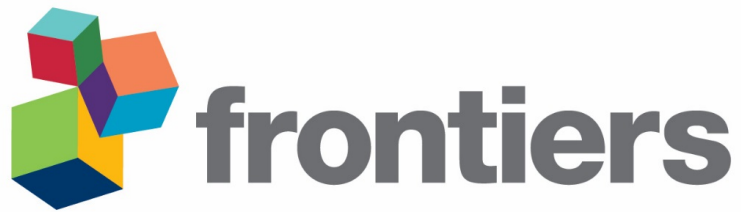

**S**
